# Supplementary material for: A quantitative hypermorphic CNGC allele confers ectopic calcium flux and impairs cellular development
Source: eLife journal article supplement (doi:10.7554/elife.25012), 2017-09-21
Supplement: supp [file elife-25012-supp-v1.zip]

Archive with 27 entries (27 files):
- elife_poa_e25012_Figure_2_figure_supplement_1.pdf
- elife_poa_e25012_Figure_3_source_data_3.xlsx
- elife_poa_e25012_Figure_2_figure_supplement_2.pdf
- elife_poa_e25012_Supplementary_File_2.pdf
- elife_poa_e25012_Figure_3_figure_supplement_1.pdf
- elife_poa_e25012_Figure_2_figure_supplement_5.pdf
- elife_poa_e25012_Figure_1_figure_supplement_2.pdf
- elife_poa_e25012_Figure_1_source_data_1.xlsx
- elife_poa_e25012_Figure_2_figure_supplement_3.pdf
- elife_poa_e25012_Figure_2_source_data_2.xlsx
- elife_poa_e25012_Transparent_Reporting_File.pdf
- elife_poa_e25012_Figure_2_source_data_1.xlsx
- elife_poa_e25012_Figure_1_figure_supplement_1.pdf
- elife_poa_e25012_Figure_2_source_data_6.xlsx
- elife_poa_e25012_Figure_2_source_data_7.xlsx
- elife_poa_e25012_Figure_3_source_data_2.xlsx
- elife_poa_e25012_Supplementary_File_1.pdf
- elife_poa_e25012_Supplementary_File_3.pdf
- elife_poa_e25012_Figure_2_figure_supplement_6.pdf
- elife_poa_e25012_Figure_3_figure_supplement_2.pdf
- elife_poa_e25012_Figure_2_figure_supplement_4.pdf
- elife_poa_e25012_Figure_1_figure_supplement_3.pdf
- elife_poa_e25012_Figure_2_source_data_3.xlsx
- elife_poa_e25012_Figure_3_source_data_1.xlsx
- elife_poa_e25012_Figure_2_source_data_4.xlsx
- elife_poa_e25012_Figure_2_source_data_5.xlsx
- elife_poa_e25012_Figure_3_source_data_4.xlsx
