# Supplementary material for: A quantitative hypermorphic CNGC allele confers ectopic calcium flux and impairs cellular development
Source: eLife journal article supplement (doi:10.7554/elife.25012), 2017-09-21
Supplement: supp [file elife-25012-supp-v1.zip › elife_poa_e25012_Figure_1_figure_supplement_1.pdf]

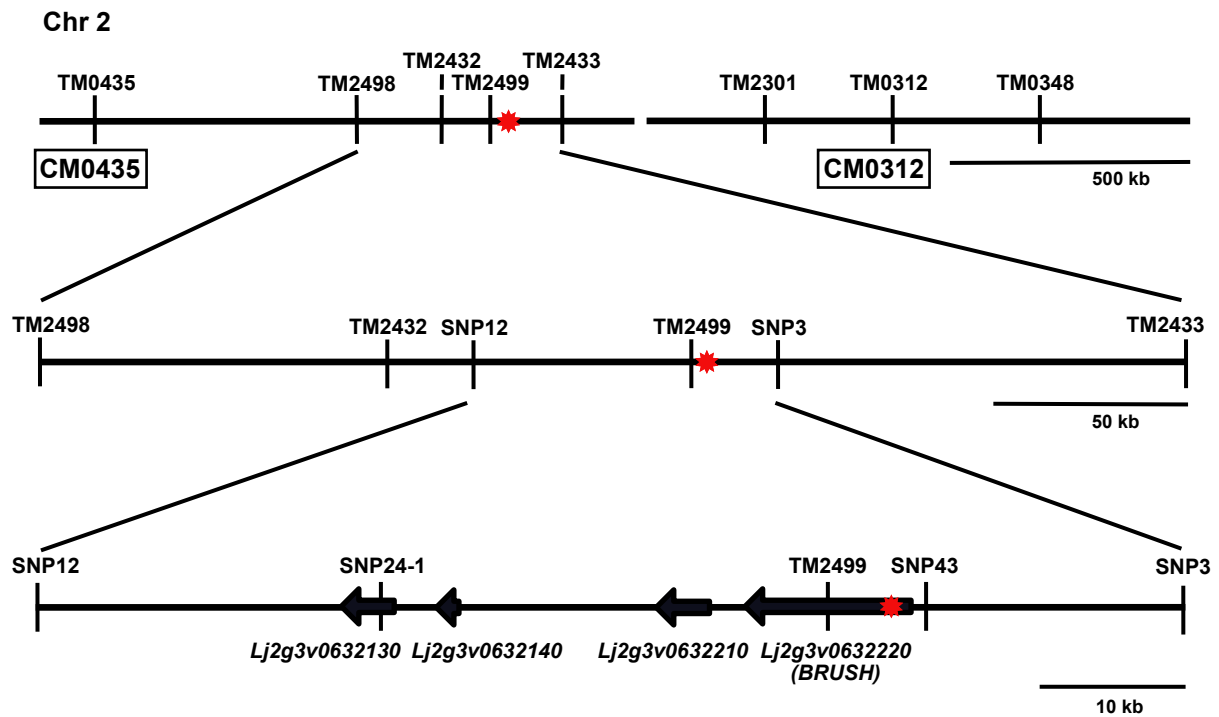

**Figure 1-figure supplement 1. Map-based cloning of the *brush* mutation on chromosome 2.** Overview of contigs CM0435 and CM0312 (*Lotus japonicus* genome v2.5) on the short arm of chromosome two surrounding the *brush* target region. The relative location of SSR and SNP markers used for mapping are indicated on the contigs. The *brush* mutation was previously linked to TM0312 by rough mapping. The red asterisk indicates the position of the EMS-induced mutation found in *brush*. SSR markers were analyzed by fluorescent PCRs and SNPs were genotyped by sequencing.
