# Supplementary material for: A quantitative hypermorphic CNGC allele confers ectopic calcium flux and impairs cellular development
Source: eLife journal article supplement (doi:10.7554/elife.25012), 2017-09-21
Supplement: supp [file elife-25012-supp-v1.zip › elife_poa_e25012_Figure_1_figure_supplement_2.pdf]

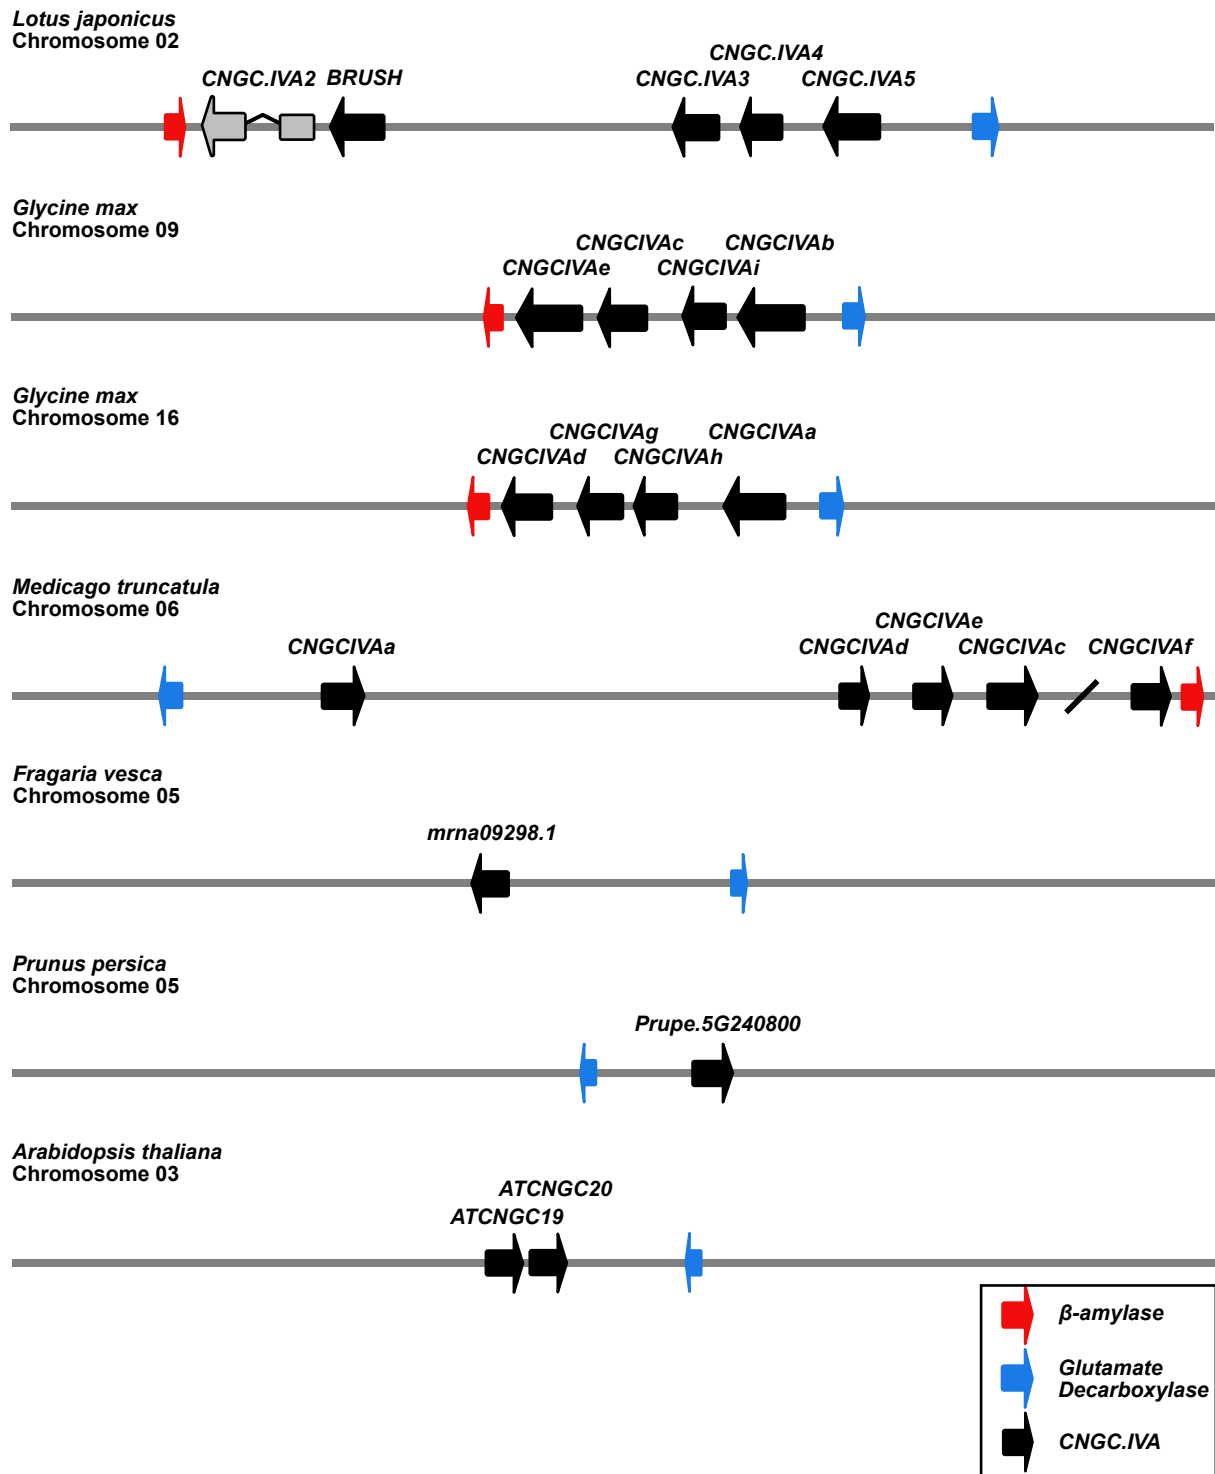

**Figure 1-figure supplement 2. Syntenic chromosomal locations of *CNGC.IVA* genes in selected species.** *L. japonicus* contains five *CNGC.IVA* genes in a cluster on chromosome two. The *CNGC.IVA* cluster is bordered by genes encoding for β-amylase and glutamate decarboxylase. Other legumes such as *Glycine max* (soybean) and *Medicago truncatula* also contain a cluster of *CNGC.IVA* genes with the same anchor genes. In contrast, two non-legume plant species of the Rosaceae family (*Fragaria vesca* and *Prunus persica*) contain a single *CNGC.IVA* copy in association with the glutamate decarboxylase anchor. Also shown is chromosome three of *Arabidopsis thaliana* which contains two *CNGC.IVA* copies. The slash between *CNGC.IVAc* and *CNGC.IVAf* on *Medicago* chromosome six represents a gap of 480 kb.
