# Supplementary material for: A quantitative hypermorphic CNGC allele confers ectopic calcium flux and impairs cellular development
Source: eLife journal article supplement (doi:10.7554/elife.25012), 2017-09-21
Supplement: supp [file elife-25012-supp-v1.zip › elife_poa_e25012_Figure_1_figure_supplement_3.pdf]

BRUSH MPQFDKDGVPVLLT--HAQQSDEFMDSNCRRLSYRTRSAS-ISIPMVPIEPYEGGTHLVGHTGPLRSVRKPPSGQMSGPLYATTAGA  
LJCNGC.IVA3 .A.....E..M.S...R...F..LE.F.V..F.S.....M.....SM...DTKPN.....LK.T.FV.....P..T  
LJCNGC.IVA4 .ASSENNEH.T...A--EE.SYG.PLHTRFQ..ASN.Q...C.....S...S...KE.S..KQRS.....T  
LJCNGC.IVA5 .AN.KN.E..M.A..KAR.RPG.GPF..KFQ..VT..Q...T..V.LSSM.Q...D.SVIR.....Q.K.NA.LM.....K..P..T

\* CD

BRUSH GNHFQHSIAVPGKKAVERGKTQQLSTFDGTDENLWNNNYDRKNEHLLRSGQLGMCNDPYCTTCPTYIKASQKG--NPKVSTVFDSKFHN  
LJCNGC.IVA3 F...D.....A.E.TA.SN.DDF.....S...H...N.....N.....F.P...R...A.....P...  
LJCNGC.IVA4 .LL.Q..CLT.N.PE.SN.GSI.....YSDK...N..K...R.V.I...CF..YA.NS...HSQLVY..A..IS...  
LJCNGC.IVA5 A.LL.QH.IGI.NR.E.R..ENFAA.RS.GP.Y.D..H.....FN...QR..K..P..I..H...

TM1 TM2

BRUSH SLYGEAKGFGRLKFSFCSSCVPGVMPNPHAKVVQWKNFLAMFCLMAIFVDPLFFFLFYVRKDSNCIVIDLTMTKILLLLRSINDVVYL  
LJCNGC.IVA3 F...D.....A.E.TA.SN.DDF.....S...H...N.....N.....F.P...R...A.....P...  
LJCNGC.IVA4 A...D.....A.NHN..Y..Y.....T.FI...V..I...V.....L..QR.F...A.NWRL..A.VIV.....FI.F  
LJCNGC.IVA5 V...D.....A..YL...YF.....T..I.....I.....L..QQ.YK...NWA..IG.V...F...

TM3 TM4

BRUSH LNILLQFRLAYVSPSTVVGAGDLVDNPKKIALNYVKGYFFFDLFVSPPLPQIMILFVLPTSLGSPGPNSTKNVLHVAVLLQYVPRL  
LJCNGC.IVA3 F...V.....R.....H.....H.L...L.L...L...N...S.A...L.RA...V..I...  
LJCNGC.IVA4 F...V.....R.....H.....H.L...L.L...L...E.M..R.A.YA..L.RAVI.V..I...  
LJCNGC.IVA5 ..F..K.....H..R..RH.LR..LI..I.F.....T..NT..W.A.HA..L.RA.I.V..I.K.

TM5

BRUSH FRFLPLLIGQSPTGFI FESAWNFVINLLIFMLSGHVVGSCWYLFGLQRVNQCLQNCHSSIKH--GCTELIDCDSRM-----GQM  
LJCNGC.IVA3 ..V.....A..I.....S.....RDA..R.NISNMI..M.....PK.....ANL  
LJCNGC.IVA4 ..V.....A..I.....Y..AS.....FR.A...SVP...LRF...GIDHDRNYLQ.PK  
LJCNGC.IVA5 ..V.....A..I.....Y..AS.....RDA..K.NIT...MKF...GRGRGLN...NT

F TM6

BRUSH SAMWRNNTNATACLNSTS-GSPFYGIYDRAVALTTETKVVKYVFALFWGFQQISTLAGNQNPSPYFEWEVLFMTAIIIGLGLLLFALLI  
LJCNGC.IVA3 .RL.SI.E.....D.A..NA.....K.....R..N..Y.....E..V.....S.....  
LJCNGC.IVA4 .EQ.N...D.I..WG.P.T...D...GN..P..K.DM.T...S.....LT..N.V.....T...S.....  
LJCNGC.IVA5 .NQ.K...D.IN...PP.D.G.....EL..P..I..N..N..YS.....I..V...V.....S.M.....I...

GNIQNFLQALGRRRLEMQLRGRDVEQWMSHRRLEPLRRKVRQAERYSWAATRGVNEEMLENLPEDLQTDIRRHLLFKFAKKVRI FAL

BRUSH GNINQNFLQALGRRRLEMQLRGRDVEQWMSHRRLEPLRRKVRQAERYSWAATRGVNEEMLENLPEDLQTDIRRHLLFKFAKKVRI FAL  
LJCNGC.IVA3 ..M.....G.....Q.....R..F...RY...D...R.....T.....MV.....R.....V...L.S.  
LJCNGC.IVA4 ..M.....G.....Q.....R..F...RY...D...R.....T.....MV.....R.....V...L.S.  
LJCNGC.IVA5 ..M.....G.....Q.....R..F...RY...D...R.....T.....MV.....R.....V...L.S.

CNBD

BRUSH MDEPILDAIRERLKQKTYIKGSRI LSRGSLVEKMFVVRGKLESIGEDGIGVPLSEGDACGEELLTWYLENSSVSKDGKKVRLPGQRL  
LJCNGC.IVA3 ..C.....C.....T...Q...V.NK.G.....A.....TR...V.....H.....T...IK...G.  
LJCNGC.IVA4 ..V.....VC...R.....K...Q...I.....I.....TRM.....M.....H.....S..R.....  
LJCNGC.IVA5 ..V.....VC...R.....K...Q...I.....I.....TRM.....M.....H.....S..R.....

BRUSH LSNRTVRCLTNVEAFSLHAADLEEVTFLFTRFLRSPQVQGLALRYESPWRS LAANRIQVAWRYRKRLGRARANISQSDQTPKS  
LJCNGC.IVA3 Q.....K.....G...R.....I.....D.....S...NTSQGL.....  
LJCNGC.IVA4 .S...IK.....R...R...L...H..R.....T.....QN..HSSL.G.....  
LJCNGC.IVA5 V.....K.....S.....I.....Q.....S.VNSSVTTKH.....

**Figure 1-figure supplement 3. Protein sequence comparison of Group IVA CNGCs from *Lotus japonicus*.** Protein sequence alignment of BRUSH (CNGC.IVA1), CNGC.IVA3, CNGC.IVA4, and CNGC.IVA5. Residues identical to BRUSH are shown as dots and gaps are shown as dashes. Shown is the Group IVA CNGC conserved domain (CD, green), *brush* mutation (red asterisk), predicted transmembrane domains (TM, light blue), putative selectivity filter (F, orange) in the pore region, and the cyclic nucleotide-binding domain (CNBD, purple). CNGC.IVA3 (81%), CNGC.IVA4 (65%), and CNGC.IVA5 (72%) show high sequence identity to BRUSH.
