# Supplementary material for: A quantitative hypermorphic CNGC allele confers ectopic calcium flux and impairs cellular development
Source: eLife journal article supplement (doi:10.7554/elife.25012), 2017-09-21
Supplement: supp [file elife-25012-supp-v1.zip › elife_poa_e25012_Figure_1_source_data_1.xlsx]

## Sheet: Sheet1
Figure 1B Source Data
Protein amino acid sequences used for phylogenetic analysis
ATCNGC1	MNFRQEKFVRFQDWKSDKTSSDVEYSGKNEIQTGIFQRTISSISDKFYRSFESSSARIKLFKRSYKSYSFKEAVSKGIGSTHKILDPQGPFLQRWNKIFVLACIIAVSLDPLFFYVPIIDDAKKCLGIDKKMEITASVLRSFTDVFYVLHIIFQFRTGFIAPSSRVFGRGVLVEDKREIAKRYLSSHFIIDILAVLPLPQMVILIIIPHMRGSSSLNTKNMLKFIVFFQYIPRFIRIYPLYKEVTRTSGILTETAWAGAAFNLFLYMLASHVFGAFWYLFSIERETVCWKQACERNNPPCISKLLYCDPETAGGNAFLNESCPIQTPNTTLFDFGIFLDALQSGVVESQDFPQKFFYCFWWGLQNLSSLGQNLKTSTYIWEICFAVFISIAGLVLFSFL…
ATCNGC2	MPSHPNFIFRWIGLFSDKFRRQTTGIDENSNLQINGGDSSSSGSDETPVLSSVECYACTQVGVPAFHSTSCDQAHAPEWRASAGSSLVPIQEGSVPNPARTRFRRLKGPFGEVLDPRSKRVQRWNRALLLARGMALAVDPLFFYALSIGRTTGPACLYMDGAFAAVVTVLRTCLDAVHLWHVWLQFRLAYVSRESLVVGCGKLVWDPRAIASHYARSLTGFWFDVIVILPVPQAVFWLVVPKLIREEKVKLIMTILLLIFLFQFLPKIYHCICLMRRMQKVTGYIFGTIWWGFALNLIAYFIASHVAGGCWYVLAIQRVASCIRQQCMRTGNCNLSLACKEEVCYQFVSPTSTVGYPCLSGNLTSVVNKPMCLDSNGPFRYGIYRWALPVISSNSLAVK…
ATCNGC3	MMNPQRNKFVRFNGNDDEFSTKTTRPSVSSVMKTVRRSFEKGSEKIRTFKRPLSVHSNKNKENNKKKKILRVMNPNDSYLQSWNKIFLLLSVVALAFDPLFFYIPYVKPERFCLNLDKKLQTIACVFRTFIDAFYVVHMLFQFHTGFITPSSSGFGRGELNEKHKDIALRYLGSYFLIDLLSILPIPQVVVLAIVPRMRRPASLVAKELLKWVIFCQYVPRIARIYPLFKEVTRTSGLVTETAWAGAALNLFLYMLASHVFGSFWYLISIERKDRCWREACAKIQNCTHAYLYCSPTGEDNRLFLNGSCPLIDPEEITNSTVFNFGIFADALQSGVVESRDFPKKFFYCFWWGLRNLSALGQNLKTSAFEGEIIFAIVICISGLVLFALLIGNMQKYLQ…
ATCNGC4	MATEQEFTRASRFSRDSSSVGYYSEEDNTEEEDEEEEEMEEIEEEEEEEEEEDPRIGLTCGGRRNGSSNNNKWMMLGRILDPRSKWVREWNKVFLLVCATGLFVDPLFLYTLSVSDTCMCLLVDGWLALTVTALRSMTDLLHLWNIWIQFKIARRWPYPGGDSDGDTNKGGGTRGSTRVAPPYVKKNGFFFDLFVILPLPQVVLWVVIPSLLKRGSVTLVVSVLLVTFLFQYLPKIYHSIRHLRRNATLSGYIFGTVWWGIALNMIAYFVAAHAAGACWYLLGVQRSAKCLKEQCENTIGCDLRMLSCKEPVYYGTTVMVLDRARLAWAQNHQARSVCLDINTNYTYGAYQWTIQLVSSESRLEKILFPIFWGLMTLSTFGNLESTTEWSEVVFNIIVL…
ATCNGC5	MAGKRENFVRVDDLDSRLPSSSVAFQQNYASNFSGQLHPIHASNETSRSFKKGIQKGSKGLKSIGRSLGFGVYRAVFPEDLKVSEKKIFDPQDKFLLYCNKLFVASCILSVFVDPFFFYLPVINAESKCLGIDRKLAITASTLRTFIDVFYLAHMALQLRTAYIAPSSRVFGRGELVIDPAQIAKRYLQRWFIIDFLSVLPLPQIVVWRFLQSSNGSDVLATKQALLFIVLVQYIPRFLRVLPLTSELKRTAGVFAETAWAGAAYYLLLYMLASHIVGAFWYLLALERNDACWQEACIDAGNCSTDFLYCGNQNMDGYAVWNRAKESVLKSKCRADLDDNNPPFDFGIYTQALSSGIVSSQNFIVKYCYCLWWGLQNLSTLGQGLETSTYPMEIIFSIS…
ATCNGC6	MFDTCGPKGVKSQVISGQRENFVRLDSMDSRYSQSSETGLNKCTLNIQGGPKRFAQGSKASSGSFKKGFRKGSEGLWSIGRSIGLGVSRAVFPEDLEVSEKKIFDPQDKFLLLCNKLFVASCILAVSVDPLFLYLPFINDKAKCVGIDRKLAIIVTTIRTVIDSFYLFHMALRFRTAYVAPSSRVFGRGELVIDPAQIAKRYLQQYFIIDLLSVLPVPQIIVWRFLYTSRGANVLATKQALRYIVLVQYIPRFLRMYPLSSELKRTAGVFAETAWAGAAYYLLLYMLASHIVGALWYLLALERNNDCWSKACHNNQNCTRNFLFCGNQNMKGYAAWDNIKVSYLQLKCPVNVPEDEEPPFDFGIYLRALSSGIVSSKNFVSKYFFCLWWGLQNLSTLGQ…
ATCNGC7	MMMQRNCFGFNLKNRGGEKKKASKSFREGVKKIRSEGLITIGKSVTRAVFPEDLRITEKKIFDPQDKTLLVWNRLFVISCILAVSVDPLFFYLPIVDNSGSSCIGIDTKLAVTTTTLRTIVDVFYLTRMALQFRTAYIAPSSRVFGRGELVIDPAKIAERYLTRYFVVDFLAVLPLPQIAVWKFLHGSKGSDVLPTKTALLNIVIVQYIPRFVRFIPLTSELKKTAGAFAEGAWAGAAYYLLWYMLASHITGAFWYMLSVERNDTCWRFACKVQPDPRLCVQILYCGTKFVSSGETEWIKTVPELLKSNCSAKADDSKFNYGIYGQAISSGIVSSTTFFSKFCYCLWWGLQNLSTLGQGLQTSTFPGEVLFSIAIAIAGLLLFALLIGNMQTYLQSLTV…
ATCNGC8	MYKSQYISGHREKFVRLDDTDSRVSMSSNATGMKKRSCFGLFNVTSRGGGKTKNTSKSFREGVKIGSEGLKTIGKSFTSGVTRAVFPEDLRVSEKKIFDPQDKTLLLWNRMFVISCILAVSVDPLFFYLPIVDNSKNCIGIDSKLAVTTTTLRTIIDVFYLTRMALQFRTAYIAPSSRVFGRGELVIDPAKIAERYLTRYFIVDFLAVLPLPQIAVWKFLHGSKGTDVLPTKQALLHIVITQYIPRFVRFIPLTSELKKTAGAFAEGAWAGAAYYLLWYMLASHITGAFWYMLSVERNDTCLRSACKVQPDPKVCVQILYCGSKLMSSRETDWIKSVPDLFKNNCSAKSDESKFNYGIYSQAVSSGIVSSTTFFSKFCYCLWWGLQNLSTLGQGLQTST…
ATCNGC9	MLDCGKKAVKSQVISGRLEKFVRLDSMDSRYSQTSDTGLNRCTLNLQGPTRGGGAQGNNVSSGSFKKGFRKGSKGLWSIGRSIGLGVSRAVFPEDLKVSEKKIFDPQDKFLLLCNKLFVTSCILAVSVDPLFLYLPFVKDNEKCIGIDRKLAIIATTLRTVIDAFYLFHMALRFRTAFVAPSSRVFGRGELVIDPAQIAKRYLQQYFIIDFLSVLPLPQIVVWRFLYISKGASVLATKRALRSIILVQYIPRFIRLYPLSSELKRTAGVFAETAWAGAAYYLLLYMLASHIVGAIWYLLALERYNGCWTKVCSNSSLDCHRNFLFCGNEKMDGYAAWTTIKDSVLQLNCPVNTTDNPPFDFGIYLRALSSGIVSSKSFVSKYFFCLWWGLQNLSTLGQG…
ATCNGC10	MAFSHDNRVRFKDEGKPLSSEYGYGRKARPSLDRVFKNVKWGFKKPLSFPSHKDPDHKETSSVTRKNIINPQDSFLQNWNKIFLFACVVALAIDPLFFYIPIVDSARHCLTLDSKLEIAASLLRTLIDAFYIIHIVFQFRTAYIAPSSRVFGRGELVDDAKAIALKYLSSYFIIDLLSILPLPQIVVLAVIPSVNQPVSLLTKDYLKFSIIAQYVPRILRMYPLYTEVTRTSGIVTETAWAGAAWNLSLYMLASHVFGALWYLISVEREDRCWQEACEKTKGCNMKFLYCENDRNVSNNFLTTSCPFLDPGDITNSTIFNFGIFTDALKSGVVESHDFWKKFFYCFWWGLRNLSALGQNLQTSKFVGEIIFAISICISGLVLFALLIGNMQKYLESTTV…
ATCNGC11	MNLQRRKFVRLDSTGVDGKLKSVRGRLKKVYGKMKTLENWRKTVLLACVVALAIDPLFLFIPLIDSQRFCFTFDKTLVAVVCVIRTFIDTFYVIHIIYYLITETIAPRSQASLRGEIVVHSKATLKTRLLFHFIVDIISVLPIPQVVVLTLIPLSASLVSERILKWIILSQYVPRIIRMYPLYKEVTRAFGTVAESKRVGAALNFFLYMLHSYVCGAFWYLSSIERKSTCWRAACARTSDCNLTVTDLLCKRAGSDNIRFLNTSCPLIDPAQITNSTDFDFGMYIDALKSGVLEVKPKDFPRKFVYCFWWGLRNISALGQNLETSNSAGEIFFAIIICVSGLLLFAVLIGNVQKYLQSSTTRVDEMEEKKRDTEKWMSYREIPEYLKERIRRFEDYKWR…
ATCNGC12	MNHRRSKFARIDSMGVDGKLKSVRGRLKKVYGKMKTLENWRKTVLLACVVALAIDPLFLFIPLIDSQRFCFTFDKTLVAVVCVIRTFIDTFYVIHIIYYLITETIAPRSQASLRGEIVVHSKATLKTRLLFHFIVDIISVLPIPQVVVLTLIPLSASLVSERILKWIILSQYVPRIIRMYPLYKEVTRAFGTVAESKWAGAALNLFLYMLHSYVFGAFWYLSSIERKSKCWRAACARTSDCNLTVTDLLCKRAGSDNIRFLNTSCPLIDPAQITNSTDFDFGMYIDALKSGVLEVKPKDFPRKFVYCFWWGLRNISALGQNLETSNSAGEIFFAIIICVSGLLLFAVLIGNVQKYLQSSTTRVDEMEEKRRDTEKWMSYRVIPEYLKERIRRFEDYKWR…
ATCNGC13	MAFGRNNRVRFRDWISEGTEYGYGRNKARPSLNTVLKNVRRGLKKPLSFGSHNKKRDSNSSTTTQKNIINPQGSFLQNWNKIFLFASVIALAIDPLFFYIPIVDGERHCLNLHRNLEIAASVLRTFIDAFYIIHIVFQFRTAYISPSSRVFGRGELVDDPKAIAIKYLSSYFIIDLLSILPLPQLVVLAVIPNVNKPVSLITKDYLITVIFTQYIPRILRIYPLYTEVTRTSGIVTETAWAGAAWNLSLYMLASHVFGALWYLISVEREDRCWREACEKIPEVCNFRFLYCDGNSSVRNDFLTTSCPFINPDDITNSTVFNFGIFTDALKSGIVESDDFWKKFFYCFWWGLRNLSALGQNLNTSKFVGEIIFAVSICISGLVLFALLIGNMQKYLESTT…
ATCNGC14	MEFKRDNTVRFYGDEKQTIEVGEKRVPLFKSTTAPFMKQEVLPKKSKTRLKIPRFGRFKVFPENFEIERDKILDPGGDAVLQWNRVFLFWCLVALYVDPLFFFLSSVKRIGRSSCMTTDLKLGIVITFFRTLADLFYVLHIVIKFRTAYVSRTSRVFGRGELVKDPKLIARRYLRSDFIVDLIACLPLPQIVSWFILPSIRSSHSDHTTNALVLIVLVQYIPRLYLIFPLSAEIIKATGVVTTTAWAGAAYNLLQYMLASHILGSAWYLLSIERQATCWKAECHKESVPLQCVTDFFDCGTLHRDDRNNWQNTTVVFSNCDPSNNIQFTFGIFADALTKNVVSSPFLEKYLYCLWFGLQNLSSYGQNLSTSTSVLETMFAILVAIFGLVLFALLIGNMQ…
ATCNGC15	MGYGNSRSVRFQEDQEVVHGGESGVKLKFKINGTQINNVKMMSKGKFLKAKVLSRVFSEDLERVKTKILDPRGQTIRRWNKIFLIACLVSLFVDPLFFFLPVMRNEACITIGVRLEVVLTLIRSLADAFYIAQILIRFRTAYIAPPSRVFGRGELVIDSRKIAWRYLHKSFWIHLVAALPLPQVLIWIIIPNLRGSPMTNTKNVLRFIIIFQYVPRMFLIFPLSRQIIKATGVVTETAWAGAAYNLMLYMLASHVLGACWYLLAVERQEACWRHACNIEKQICQYRFFECRRLEDPQRNSWFEWSNITTICKPASKFYEFGIFGDAVTSTVTSSKFINKYFYCLWWGLKNLSSLGQNLATSTYAGEILFAIIIATLGLVLFALLIGNMQTYLQSTTMRL…
ATCNGC16	MSNLHLYTSARFRNFPTTFSLRHHHNDPNNQRRRSIFSKLRDKTLDPGGDLITRWNHIFLITCLLALFLDPLYFYLPIVQAGTACMSIDVRFGIFVTCFRNLADLSFLIHILLKFKTAFVSKSSRVFGRGELVMDRREIAIRYLKSEFVIDLAATLPLPQIMIWFVIPNAGEFRYAAHQNHTLSLIVLIQYVPRFLVMLPLNRRIIKATGVAAKTAWSGAAYNLILYLLVSHVLGSVWYVLSIQRQHECWRRECIKEMNATHSPSCSLLFLDCGSLHDPGRQAWMRITRVLSNCDARNDDDQHFQFGMFGDAFTNDVTSSPFFDKYFYCLWWGLRNLSSYGQSLAASTLSSETIFSCFICVAGLVFFSHLIGNVQNYLQSTTARLDEWRVRRRDTEEWM…
ATCNGC17	MELRKDKLLMFYSEGKESKEAKWAVNDPMSKSYKLSLPSALRPDNLLPGNRLRYTDASKSKSSKVSWYKTILDPGSEIVLKWNWVFIVSCMVALFIDPLYFFVPAIGGDKNYPCARTDTSLSILVTFFRTIADLFYLLHIFIKFRTGFIAPNSSTRVFGRGELVMDPKAIAWRYIKSDFIIDLIATLPLPQIVIWFVISTTKSYRFDHNNNAIALIVLLQYIPRFYLIIPLSSQIVKATGVVTKTAWAGAAYNLLLYMLASHVLGAAWYILSVDRYTSCWKSRCNGEAGQVNCQLYYLDCDSMYDNNQMTWANVTKVFKLCDARNGEFKYGIFGNAITKNVVSSQFFERYFYCLWWGLQQLSSYGQNLSTTMFMGETTFAVLIAIFGLVLFAHLIGNMQ…
ATCNGC18	MNKIRSLRCLLPETITSASTAASNRGSDGSQFSVLWRHQILDPDSNIVTYWNHVFLITSILALFLDPFYFYVPYVGGPACLSIDISLAATVTFFRTVADIFHLLHIFMKFRTAFVARSSRVFGRGELVMDSREIAMRYLKTDFLIDVAAMLPLPQLVIWLVIPAATNGTANHANSTLALIVLVQYIPRSFIIFPLNQRIIKTTGFIAKTAWAGAAYNLLLYILASHVLGAMWYLSSIGRQFSCWSNVCKKDNALRVLDCLPSFLDCKSLEQPERQYWQNVTQVLSHCDATSSTTNFKFGMFAEAFTTQVATTDFVSKYLYCLWWGLRNLSSYGQNITTSVYLGETLFCITICIFGLILFTLLIGNMQSSLQSMSVRVEEWRVKRRDTEEWMRHRQLPPE…
ATCNGC19	MAHTRTFTSRNRSVSLSNPSFSIDGFDNSTVTLGYTGPLRTQRIRPPLVQMSGPIHSTRRTEPLFSPSPQESPDSSSTVDVPPEDDFVFKNANLLRSGQLGMCNDPYCTTCPSYYNRQAAQLHTSRVSASRFRTVLYGDARGWAKRFASSVRRCLPGIMNPHSKFVQVWTRVLAFSSLVAIFIDPLFFFLLLIQQDNKCIAIDWRATKVLVSLRSITDLIFFINILLQFRLAYVAPESRIVGAGQLVDHPRKIARHYFRGKFLLDMFIVFPIPQIMILRIIPLHLGTRREESEKQILRATVLFQYIPKLYRLLPLLAGQTSTGFIFESAWANFVINLLTFMLAGHAVGSCWYLSALQRVKKCMLNAWNISADERRNLIDCARGSYASKSQRDLWRDNAS…
ATCNGC20	MASHNENDDIPMLPISDPSSRTRARAFTSRSRSVSLSNPTSSIEGFDTSTVVLGYTGPLRTQRRPPLVQMSGPLTSTRKHEPLFLPHPSSDSVGVSSQPERYPSFAALEHKNSSEDEFVLKHANLLRSGQLGMCNDPYCTTCPSYYNRKAAQIPTSRVSALFDSTFHNALYDDAKGWARRFASSVNRYLPGIMNPHAKEVQTWTKFFALSCLLAIFIDPLFFFLIKVQEQNKCIMIDWPMTKAFVAVRSVTDVIFTMNILLQFRLAYVARESTVVGAGQLVSHPKKIALHYLKGKFFLDLFIVMPLPQILILWIIPAHLGASGANYAKNLLRAAVLFQYIPKLYRLLPFLAGQTPTGFIFESAWANFVINLLTFMLAGHVVGSCWYLFGLQRVNQCLRN…
BRUSH	MPQFDKDGVPVLLETHAQQSDEFMDSNCRRLSYRTRSASISIPMVPIEPYEGGTHLVGHTGPLRSVRKPPSGQMSGPLYATTAGAGNHFQHSIAVPGKKAVEGKTQQLSTFDGTDENLWNNNYDRKNEHLLRSGQLGMCNDPYCTTCPTYIKASQKGNPKVSTVFDSKFHNSLYGEAKGFGRKLFSFCSSCVPGVMNPHAKVVQQWNKFLAMFCLMAIFVDPLFFFLFYVRKDSNCIVIDLTMTKILLLLRSINDVVYLLNILLQFRLAYVSPESTVVGAGDLVDNPKKIALNYVKGYFFFDLFVVSPPLPQIMILFVLPTSLGSPGPNSTKNVLHVAVLLQYVPRLFRFLPLLIGQSPTGFIFESAWVNFVINLLIFMLSGHVVGSCWYLFGLQRVNQ…
