# Supplementary material for: A quantitative hypermorphic CNGC allele confers ectopic calcium flux and impairs cellular development
Source: eLife journal article supplement (doi:10.7554/elife.25012), 2017-09-21
Supplement: supp [file elife-25012-supp-v1.zip › elife_poa_e25012_Figure_2_figure_supplement_1.pdf]

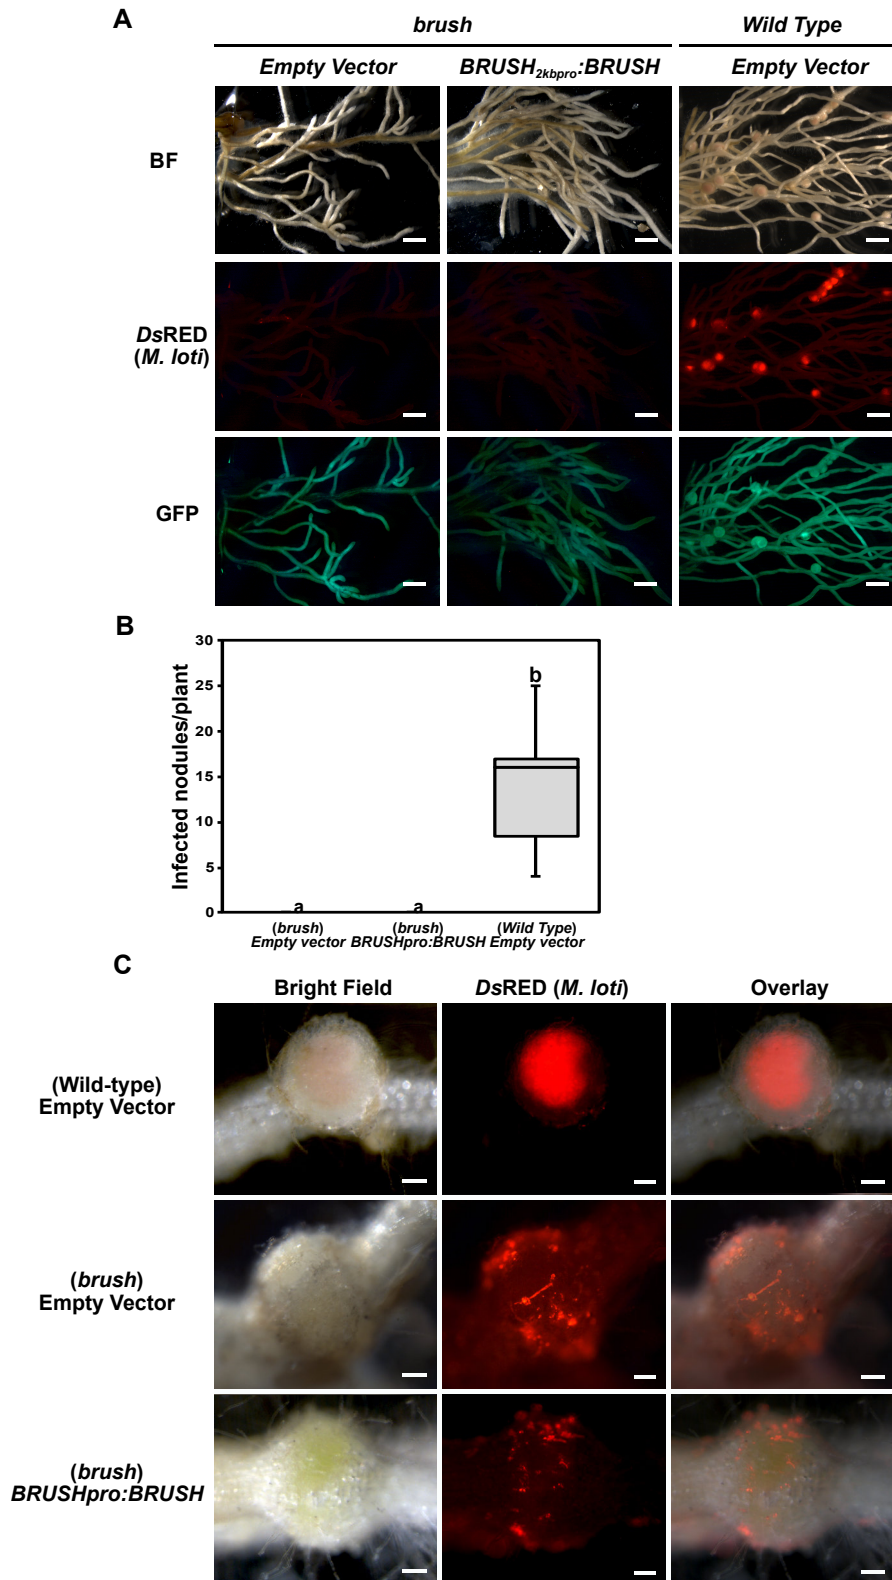

**Figure 2-figure supplement 1. Expression of the *BRUSH* native genomic sequence in *brush*.** (A) Complementation assay in *brush* by transformation of *BRUSH*<sub>2kbpro</sub>:*BRUSH*<sub>genomic</sub> or empty vector relative to Gifu wild type. No infected nodules were observed in *brush* roots expressing the *BRUSH* genomic sequence. Shown are DsRED fluorescence of rhizobia (middle panel) and GFP fluorescence (lower panel) for transformation control. Composite plants were sown in Weck jars, cultivated at 26°C, and inoculated with *M. loti* expressing DsRed. Roots were analyzed four weeks after inoculation. (B) Box plot showing the number of nodules per transformed plant (n=8) from (A). (C) Close-up of transformed roots. Scale bars in (A) represent 2 mm, 0.2 mm in (C). Different letters in (B) indicate different statistical groups (ANOVA followed by Tukey's HSD test,  $F_{(2, 21)} = 33.60$ , p-value < 0.001).
