# Supplementary material for: A quantitative hypermorphic CNGC allele confers ectopic calcium flux and impairs cellular development
Source: eLife journal article supplement (doi:10.7554/elife.25012), 2017-09-21
Supplement: supp [file elife-25012-supp-v1.zip › elife_poa_e25012_Figure_2_figure_supplement_5.pdf]

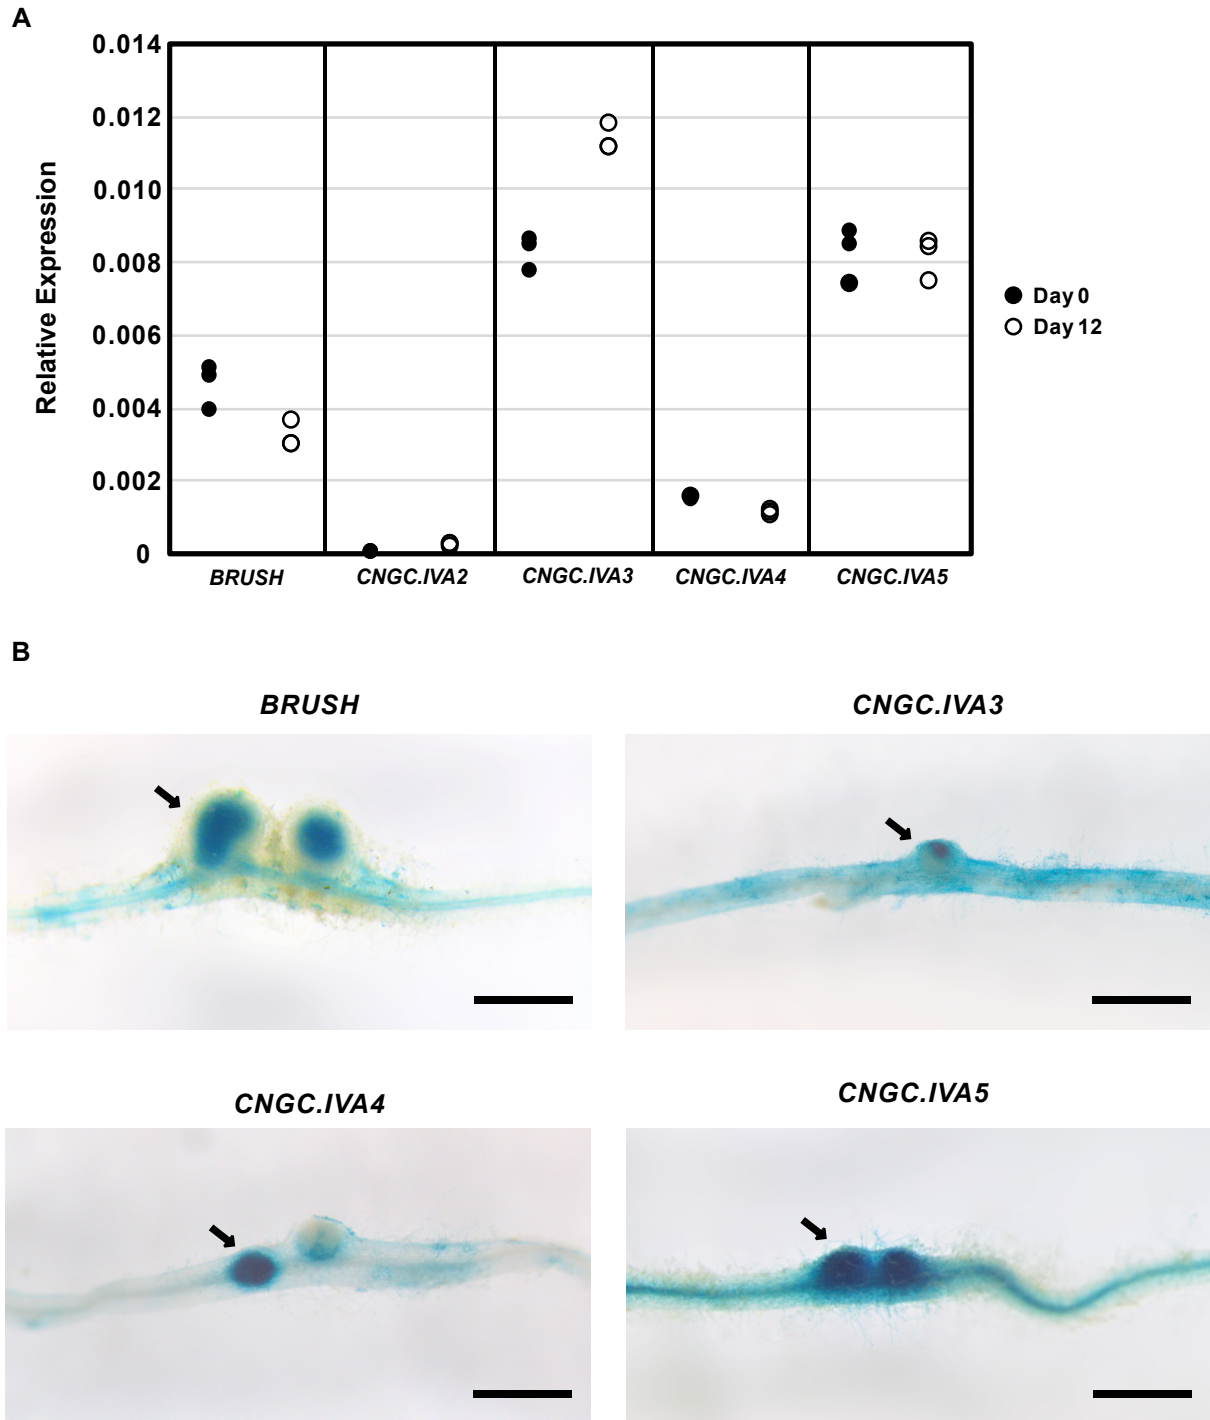

**Figure 2-figure supplement 5. *CNGC.IVA* gene expression in *Lotus japonicus* roots after rhizobial inoculation.** (A), Expression of *CNGC.IVA* cluster genes in roots as analyzed by qRT-PCR on Day 0 (●) and Day 12 (○) after inoculation with *Mesorhizobium loti*. Each point represents a biological replicate. Shown is the relative expression as calculated with the  $2^{-\Delta\Delta CT}$  method using eEF-1A $\alpha$  as a reference. (B) Promoter activity of *CNGC.IVA* genes three weeks after inoculation with *Mesorhizobium loti*. The 2kb promoter sequence of each gene was fused to GUS and introduced into Gifu wild-type plants by hairy root transformation. Expression of GUS was detected in developing nodules (arrows) after overnight staining. Scale bars in (B) represent 1 mm.
