# Supplementary material for: A quantitative hypermorphic CNGC allele confers ectopic calcium flux and impairs cellular development
Source: eLife journal article supplement (doi:10.7554/elife.25012), 2017-09-21
Supplement: supp [file elife-25012-supp-v1.zip › elife_poa_e25012_Figure_2_figure_supplement_6.pdf]

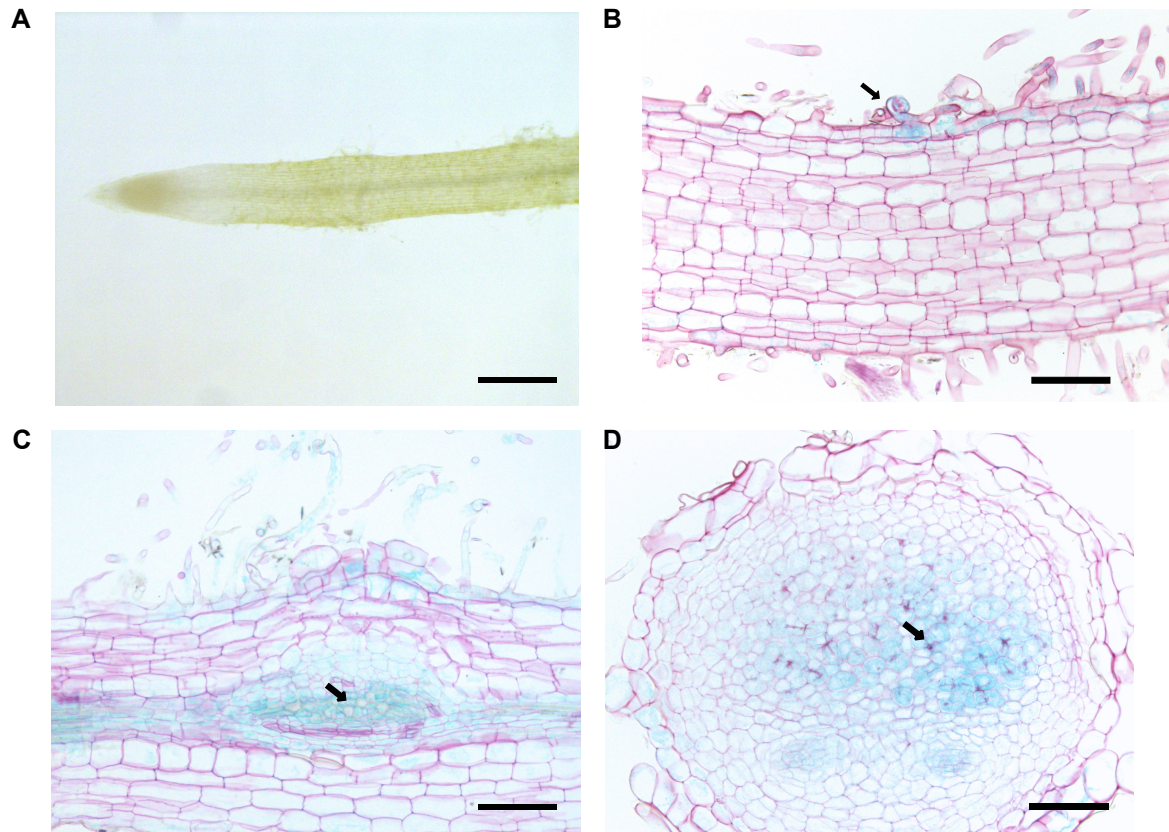

**Figure 2-figure supplement 6. *BRUSH* expression in roots during nodulation.** (A) *BRUSH* 2kb promoter activity was not evident in the root susceptible zone prior to inoculation. Three weeks after inoculation with *Mesorhizobium loti* promoter activity was observed in infected root hairs (B, arrow), nodule primordia (C, arrow) and an infected nodule (D, arrow). The promoter sequence was fused to GUS and introduced into Gifu wild-type plants by hairy root transformation. Roots were stained for GUS activity overnight and counterstained with ruthenium red after sectioning (B,C,D). Scale bars represent 0.6 mm (A), and 0.2 mm (B,C,D).
