# Supplementary material for: A quantitative hypermorphic CNGC allele confers ectopic calcium flux and impairs cellular development
Source: eLife journal article supplement (doi:10.7554/elife.25012), 2017-09-21
Supplement: supp [file elife-25012-supp-v1.zip › elife_poa_e25012_Figure_2_source_data_1.xlsx]

## Sheet: Sheet1
Figure 2C Source Data
Nodule number counts for brush complementation by overexpression
	Empty Vector	BRUSH	CNGC.IVA3	CNGC.IVA4	CNGC.IVA5
	0	6	7	10	4
	0	6	11	11	8
	0	13	15	13	9
	0	15	22	16	10
	0	26	23	21	12
	0	26	23	23	15
	0	27	24	24	23
	0	29	24	31	25
	1	33	25	32	27
	1	42	28	36	39
Box-and-Wisker Plot Calculations
	Empty Vector	BRUSH	CNGC.IVA3	CNGC.IVA4	CNGC.IVA5
Min	0	6	7	10	4
Q1	0	13.5	16.75	13.75	9.25
Median	0	26	23	22	13.5
Q3	0	28.5	24	29.25	24.5
Max	1	42	28	36	39
Box 1	0	13.5	16.75	13.75	9.25
Box 2	0	12.5	6.25	8.25	4.25
Box 3	0	2.5	1	7.25	11
Whisker Top	1	13.5	4	6.75	14.5
Whisker Bottom	0	7.5	9.75	3.75	5.25
