# Supplementary material for: A quantitative hypermorphic CNGC allele confers ectopic calcium flux and impairs cellular development
Source: eLife journal article supplement (doi:10.7554/elife.25012), 2017-09-21
Supplement: supp [file elife-25012-supp-v1.zip › elife_poa_e25012_Figure_2_source_data_2.xlsx]

## Sheet: Sheet1
Figure 2D Source Data
Relative transcript expression values after targeted RNAi of brush
	Empty Vector	5'UTR RNAi	3'UTR RNAi
	0.929094	0.16992	0.172505
	0.828847	0.0959478	0.232314
	1.76038	0.285926	0.214149
	0.576958	0.465794	0.140107
	1.00646	0.297345	0.402034
	1.27034	0.23242	0.229848
Box-and-Wisker Plot Calculations
	Empty Vector	5'UTR RNAi	3'UTR RNAi
Min	0.576958	0.0959478	0.140107
Q1	0.853909	0.185545	0.182916
Median	0.967775	0.259173	0.221999
Q3	1.20437	0.29449	0.231698
Max	1.76038	0.465794	0.402034
Box 1	0.853909	0.185545	0.182916
Box 2	0.113867	0.0736276	0.0390823
Box 3	0.236595	0.0353177	0.00969892
Whisker Top	0.556009	0.171303	0.170336
Whisker Bottom	0.27695	0.0895973	0.0428093
