# Supplementary material for: A quantitative hypermorphic CNGC allele confers ectopic calcium flux and impairs cellular development
Source: eLife journal article supplement (doi:10.7554/elife.25012), 2017-09-21
Supplement: supp [file elife-25012-supp-v1.zip › elife_poa_e25012_Figure_2_source_data_3.xlsx]

## Sheet: Sheet1
Figure 2F Source Data
Nodule number counts for brush complementation by RNAi
	Empty Vector	5'UTR RNAi	3'UTR RNAi
	1	12	12
	0	24	3
	0	10	20
	0	11	5
	0	14	9
	0	23	6
	0	14	17
	0	19	5
	0	7	12
	0	27	21
Box-and-Wisker Plot Calculations
	Empty Vector	5'UTR RNAi	3'UTR RNAi
Min	0	7	3
Q1	0	11.25	5.25
Median	0	14	10.5
Q3	0	22	15.75
Max	1	27	21
Box 1	0	11.25	5.25
Box 2	0	2.75	5.25
Box 3	0	8	5.25
Whisker Top	1	5	5.25
Whisker Bottom	0	4.25	2.25
