# Supplementary material for: A quantitative hypermorphic CNGC allele confers ectopic calcium flux and impairs cellular development
Source: eLife journal article supplement (doi:10.7554/elife.25012), 2017-09-21
Supplement: supp [file elife-25012-supp-v1.zip › elife_poa_e25012_Figure_2_source_data_4.xlsx]

## Sheet: Sheet1
Figure 2- figure supplement 1B Source Data
Nodule number counts for brush complementation
	brush	brush	Gifu WT
	Empty Vector	BRUSH:BRUSH	Empty Vector
	0	0	25
	0	0	16
	0	0	7
	0	0	9
	0	0	16
	0	0	17
	0	0	4
	0	0	17
Box-and-Wisker Plot Calculations
	brush	brush	Gifu WT
	Empty Vector	BRUSH:BRUSH	Empty Vector
Min	0	0	4
Q1	0	0	8.5
Median	0	0	16
Q3	0	0	17
Max	0	0	25
Box 1	0	0	8.5
Box 2	0	0	7.5
Box 3	0	0	1
Whisker Top	0	0	8
Whisker Bottom	0	0	4.5
