# Supplementary material for: A quantitative hypermorphic CNGC allele confers ectopic calcium flux and impairs cellular development
Source: eLife journal article supplement (doi:10.7554/elife.25012), 2017-09-21
Supplement: supp [file elife-25012-supp-v1.zip › elife_poa_e25012_Figure_2_source_data_5.xlsx]

## Sheet: Sheet1
Figure 2- figure supplement 3 Source Data
Figure 2- figure supplement 3A
Relative transcript expression values after targeted RNAi of brush
	CNGC.IVA3	CNGC.IVA3	CNGC.IVA3	CNGC.IVA4	CNGC.IVA4	CNGC.IVA4	CNGC.IVA4	CNGC.IVA4	CNGC.IVA4
	Empty Vector	5'UTR RNAi	3'UTR RNAi	Empty Vector	5'UTR RNAi	3'UTR RNAi	Empty Vector	5'UTR RNAi	3'UTR RNAi
	0.992729	0.864615	1.08043	0.896063	0.416587	0.938115	0.889194	0.86875	0.946948
	0.875451	1.10401	0.578759	0.925527	1.36275	0.833772	1.02128	1.16111	0.800524
	1.07588	0.831405	0.481772	0.858495	1.12978	0.804511	1.07879	1.54564	1.03643
	0.683189	0.983778	1.36756	1.03576	0.652057	1.13901	0.69866	0.76795	1.02443
	1.12474	0.732036	0.831828	1.22978	0.791332	0.95935	1.20979	1.06088	1.62405
	1.39182	1.2273	0.769325	1.10268	0.622687	0.646031	1.20766	1.03146	1.26216
Box-and-Wisker Plot Calculations
	CNGC.IVA3	CNGC.IVA3	CNGC.IVA3	CNGC.IVA4	CNGC.IVA4	CNGC.IVA4	CNGC.IVA4	CNGC.IVA4	CNGC.IVA4
	Empty Vector	5'UTR RNAi	3'UTR RNAi	Empty Vector	5'UTR RNAi	3'UTR RNAi	Empty Vector	5'UTR RNAi	3'UTR RNAi
Min	0.683189	0.732036	0.481772	0.858495	0.416587	0.646031	0.69866	0.76795	0.800524
Q1	0.90477	0.839707	0.626401	0.903429	0.630029	0.811826	0.922216	0.909426	0.966318
Median	1.0343	0.924196	0.800577	0.980641	0.721695	0.885943	1.05004	1.04617	1.03043
Q3	1.11252	1.07395	1.01828	1.08595	1.04517	0.954042	1.17544	1.13605	1.20573
Max	1.39182	1.2273	1.36756	1.22978	1.36275	1.13901	1.20979	1.54564	1.62405
Box 1	0.90477	0.839707	0.626401	0.903429	0.630029	0.811826	0.922216	0.909426	0.966318
Box 2	0.129532	0.0844892	0.174176	0.0772125	0.0916652	0.074117	0.127822	0.13674	0.0641111
Box 3	0.0782193	0.149753	0.217705	0.105307	0.323476	0.0680981	0.125404	0.089888	0.1753
Whisker Top	0.279298	0.153348	0.349282	0.143834	0.317576	0.184967	0.0343468	0.409586	0.418324
Whisker Bottom	0.221582	0.107671	0.144629	0.0449342	0.213443	0.165795	0.223556	0.141477	0.165794
Figure 2- figure supplement 3C
Nodule number counts for BRUSH null (SL1484-1)
	SL1484-1	Gifu WT
	7	6
	6	5
	7	4
Box-and-Wisker Plot Calculations
	SL1484-1	Gifu WT
Min	6	4
Q1	6.5	4.5
Median	7	5
Q3	7	5.5
Max	7	6
Box 1	6.5	4.5
Box 2	0.5	0.5
Box 3	0	0.5
Whisker Top	0	0.5
Whisker Bottom	0.5	0.5
