# Supplementary material for: A quantitative hypermorphic CNGC allele confers ectopic calcium flux and impairs cellular development
Source: eLife journal article supplement (doi:10.7554/elife.25012), 2017-09-21
Supplement: supp [file elife-25012-supp-v1.zip › elife_poa_e25012_Figure_2_source_data_6.xlsx]

## Sheet: Sheet1
Figure 2- figure supplement 4B Source Data
Nodule number counts for brush complementation by overexpression of ATCNGC19 and ATCNGC20
	Empty Vector	ATCNGC19	ATCNGC20
	0	10	21
	0	13	17
	0	27	28
	0	15	35
	0	21	16
	0	5	10
	1	3	20
	0	4	9
	0	6	12
	0	7	22
Box-and-Wisker Plot Calculations
	Empty Vector	ATCNGC19	ATCNGC20
Min	0	3	9
Q1	0	5.25	13
Median	0	8.5	18.5
Q3	0	14.5	21.75
Max	1	27	35
Box 1	0	5.25	13
Box 2	0	3.25	5.5
Box 3	0	6	3.25
Whisker Top	1	12.5	13.25
Whisker Bottom	0	2.25	4
