# Supplementary material for: A quantitative hypermorphic CNGC allele confers ectopic calcium flux and impairs cellular development
Source: eLife journal article supplement (doi:10.7554/elife.25012), 2017-09-21
Supplement: supp [file elife-25012-supp-v1.zip › elife_poa_e25012_Figure_2_source_data_7.xlsx]

## Sheet: Sheet1
Figure 2- figure supplement 5A Source Data
Relative expression values before (Day 0) and after (Day 12) inoculation of roots with rhizobia
	Day 0	Day 12	Day 0	Day 12	Day 0	Day 12	Day 0	Day 12	Day 0	Day 12
	BRUSH	BRUSH	CNGC.IVA2	CNGC.IVA2	CNGC.IVA3	CNGC.IVA3	CNGC.IVA4	CNGC.IVA4	CNGC.IVA5	CNGC.IVA5
	0.00512961	0.00302971	0.000123454	0.000288197	0.00866195	0.0112507	0.00155543	0.00115068	0.00890718	0.00750601
	0.0049122	0.0036923	0.000131433	0.000353174	0.00854986	0.0111941	0.00164024	0.00123528	0.00852308	0.00846159
	0.00398166	0.00307089	0.000108203	0.000251436	0.007836	0.0118799	0.00163487	0.00120929	0.00743353	0.00862304
