# Supplementary material for: A quantitative hypermorphic CNGC allele confers ectopic calcium flux and impairs cellular development
Source: eLife journal article supplement (doi:10.7554/elife.25012), 2017-09-21
Supplement: supp [file elife-25012-supp-v1.zip › elife_poa_e25012_Figure_3_figure_supplement_1.pdf]

**A**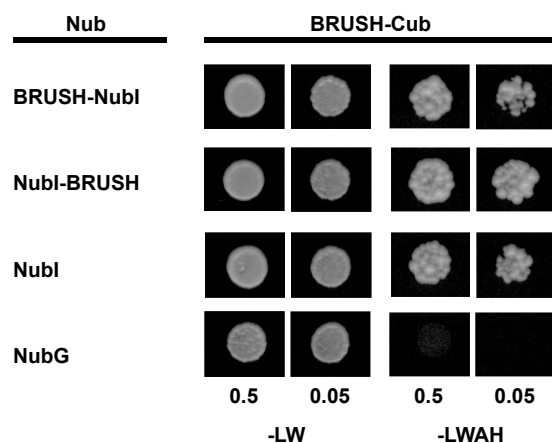

**Figure 3-figure supplement 1. BRUSH topology determination in yeast. (A)** Yeast split-ubiquitin assay to determine the location of the BRUSH termini. A fusion of BRUSH to the C-terminal fragment of ubiquitin (BRUSH-Cub) was co-transformed with BRUSH fused to the N-terminus of ubiquitin (Nubi-BRUSH or BRUSH-Nubi), Nubi alone, or a mutated version of Nub (NubG) which does not spontaneously associate. An interaction with Nubi indicates that both ubiquitin fragments are located in the cytoplasm. Shown are control plates on the left (-LW: leucine, tryptophan) and interaction tests on the right (-LWAH: leucine, tryptophan, adenine, histidine). Yeast optical densities (600 nm) were adjusted to 0.5 and diluted 10-fold.
