# Supplementary material for: A quantitative hypermorphic CNGC allele confers ectopic calcium flux and impairs cellular development
Source: eLife journal article supplement (doi:10.7554/elife.25012), 2017-09-21
Supplement: supp [file elife-25012-supp-v1.zip › elife_poa_e25012_Figure_3_source_data_1.xlsx]

## Sheet: Blatt1
Figure 3D Source Data
Curent-voltage curves for oocyte TEVC measurements (SD= standard deviation)
Voltage	Control (n=15)	SD (Control)	brush (n=26)	SD (brush)	BRUSH (n=17)	SD (BRUSH)
60	0.48	0.26	0.51	0.47	0.92	0.71
40	0.38	0.18	0.37	0.32	0.59	0.49
20	0.2	0.08	0.15	0.11	0.27	0.25
0	0.05	0.04	0.01	0.1	0.04	0.07
-20	-0.04	0.1	-0.07	0.11	-0.05	0.07
-40	-0.08	0.09	-0.21	0.16	-0.12	0.12
-60	-0.11	0.09	-0.44	0.26	-0.15	0.15
-80	-0.14	0.09	-0.79	0.41	-0.19	0.17
-100	-0.16	0.1	-1.28	0.63	-0.23	0.2
-120	-0.18	0.11	-1.91	0.92	-0.29	0.22
-140	-0.23	0.12	-2.68	1.27	-0.35	0.28
-160	-0.36	0.16	-3.64	1.67	-0.58	0.42
