# Supplementary material for: A quantitative hypermorphic CNGC allele confers ectopic calcium flux and impairs cellular development
Source: eLife journal article supplement (doi:10.7554/elife.25012), 2017-09-21
Supplement: supp [file elife-25012-supp-v1.zip › elife_poa_e25012_Figure_3_source_data_2.xlsx]

## Sheet: Sheet1
Figure 3E Source Data
Relative current-voltage relations for oocytes expressing brush and brush-YFP (SD= standard deviation)
Voltage	Ca2+ 30mM	SD (Ca2+ 30mM)	Ca2+ 15mM	SD (Ca2+ 15mM)	Ca2+ 5mM	SD (Ca2+ 5mM)
60	0.144194	0.057553	0.109106	0.0477691	0.0499076	0.0354671
40	0.112201	0.0395207	0.0767934	0.0322194	0.0355736	0.0201525
20	0.060201	0.0265364	0.0304812	0.0330897	0.0228258	0.00858386
0	0.0120815	0.0193176	-0.00417271	0.0184507	-0.011667	0.0256882
-20	-0.0141381	0.0161941	-0.00937352	0.0119792	-0.011584	0.0237463
-40	-0.0832122	0.0197354	-0.0479204	0.0128767	-0.0273411	0.032341
-60	-0.206594	0.0342987	-0.1038	0.0263649	-0.0454243	0.0424203
-80	-0.400774	0.0362506	-0.209444	0.0521516	-0.0727027	0.0551004
-100	-0.665793	0.02434	-0.34758	0.0725515	-0.112334	0.0693331
-120	-1	0	-0.538089	0.109941	-0.16548	0.0792737
-140	-1.40856	0.0714228	-0.774667	0.152484	-0.218924	0.0913258
-160	-1.88701	0.146517	-1.06385	0.195516	-0.292448	0.0925851
