# Supplementary material for: A quantitative hypermorphic CNGC allele confers ectopic calcium flux and impairs cellular development
Source: eLife journal article supplement (doi:10.7554/elife.25012), 2017-09-21
Supplement: supp [file elife-25012-supp-v1.zip › elife_poa_e25012_Figure_3_source_data_3.xlsx]

## Sheet: Sheet1
Figure 3- figure supplement 2E Source Data
Current-voltage curves for oocytes expressing BRUSH-YFP and brush-YFP in the presence of calcium (SD= standard deviation)
Voltage	Control	SD (Control)	brush-YFP	SD (brush-YFP)	BRUSH-YFP	SD (BRUSH-YFP)
60	0.48	0.26	0.61	0.41	0.46	0.29
40	0.39	0.18	0.35	0.23	0.32	0.15
20	0.22	0.09	0.16	0.12	0.16	0.07
0	0.05	0.05	0.01	0.12	0.01	0.05
-20	-0.04	0.09	-0.07	0.08	-0.05	0.08
-40	-0.08	0.08	-0.22	0.11	-0.09	0.11
-60	-0.11	0.09	-0.49	0.21	-0.1	0.13
-80	-0.14	0.09	-0.91	0.38	-0.14	0.16
-100	-0.16	0.1	-1.46	0.59	-0.19	0.17
-120	-0.18	0.11	-2.16	0.85	-0.24	0.2
-140	-0.23	0.11	-3.02	1.16	-0.29	0.25
-160	-0.35	0.15	-4.07	1.54	-0.56	0.51
