# Supplementary material for: A quantitative hypermorphic CNGC allele confers ectopic calcium flux and impairs cellular development
Source: eLife journal article supplement (doi:10.7554/elife.25012), 2017-09-21
Supplement: supp [file elife-25012-supp-v1.zip › elife_poa_e25012_Figure_3_source_data_4.xlsx]

## Sheet: Sheet1
Figure 3- figure supplement 2F Source Data
Relative current-voltage relations for oocytes expressing BRUSH-YFP and brush-YFP (SD= standard deviation)
Voltage	Ca2+ 30	SD (Ca2+ 30)	K+ 60	SD (K+ 60)
60	0.18	0.08	0.12	0.05
40	0.09	0.03	0.09	0.04
20	0.04	0.01	0.05	0.02
0	0	0	0.03	0.01
-20	-0.03	0.01	-0.01	0.02
-40	-0.09	0.02	-0.05	0.05
-60	-0.21	0.03	-0.09	0.05
-80	-0.4	0.03	-0.15	0.06
-100	-0.66	0.02	-0.2	0.07
-120	-1	0	-0.25	0.07
-140	-1.41	0.04	-0.32	0.08
-160	-1.91	0.08	-0.44	0.1
