# Supplementary material for: A quantitative hypermorphic CNGC allele confers ectopic calcium flux and impairs cellular development
Source: eLife journal article supplement (doi:10.7554/elife.25012), 2017-09-21
Supplement: supp [file elife-25012-supp-v1.zip › elife_poa_e25012_Supplementary_File_1.pdf]

**Supplementary File 1. Oligonucleotides used in this study.**

| <b>Oligo ID</b> | <b>Sequence 5'-3'</b>                         | <b>Purpose</b>             |
|-----------------|-----------------------------------------------|----------------------------|
| SNP12 F         | CATTGAATATATAAAACAACAACC                      | SNP Amplification          |
| SNP12 R         | GGAAGGTTTGGATGCGAATA                          | SNP Amplification          |
| SNP24-1 F       | CCCGAGAAAAATGCAGCTTA                          | SNP Amplification          |
| SNP24-1 R       | CGGCCAGTACCAAGCTAAAG                          | SNP Amplification          |
| SNP43 F         | TCCGTCATGAACATTGAGATG                         | SNP Amplification          |
| SNP43 R         | CTCCTAAAGATAGCGTTGAGC                         | SNP Amplification          |
| SNP3 F          | AGATTGTCTTGC GCGTATGT                         | SNP Amplification          |
| SNP3 R          | ACAATGCGGATTCTGAGGTC                          | SNP Amplification          |
| KH142 F         | TCGTTTGGCCTTTTATTCTG                          | Sequencing <i>BRUSH</i>    |
| KH143 R         | AATGTAAAGGGAGGCCAGAG                          | Sequencing <i>BRUSH</i>    |
| KH144 F         | CCAAGTGGTATTCCCCATCA                          | Sequencing <i>BRUSH</i>    |
| KH145 R         | TGTGCAAAATTACTACTTAAGGAAC                     | Sequencing <i>BRUSH</i>    |
| KH146 F         | AAGGTACTCATCAAATACTTGTC                       | Sequencing <i>BRUSH</i>    |
| KH147 F         | TCACTAAAATTCCCAAAATGGT                        | Sequencing <i>BRUSH</i>    |
| KH148 R         | GGGATAGGGAATTCATCAGGA                         | Sequencing <i>BRUSH</i>    |
| KH149 F         | TCACTTTATTAGGTTCTATGCTACA                     | Sequencing <i>BRUSH</i>    |
| KH150 R         | CACTTTACAATCTAGTTCTCTATGG                     | Sequencing <i>BRUSH</i>    |
| KH219 F         | GTAAACGACGGCCAGTCTGCAGGAGCTGGAAATCAT          | dCAPS <i>BRUSH</i>         |
| KH180 R         | AGGATCATTACACATTCCAGCGGC                      | dCAPS <i>BRUSH</i>         |
| DC1 F           | ATGGTGTCTGGTTCGAGTA                           | <i>ELF1</i> qPCR           |
| DC2 R           | ATAGTCTTGCCACCGTCGAT                          | <i>ELF1</i> qPCR           |
| DC7 F           | CCAAGGAGCTCTAAGGTATGAA                        | <i>BRUSH</i> qPCR          |
| DC8 R           | TACGACTTCGGTGTGTTGATCTG                       | <i>BRUSH</i> qPCR          |
| DC9 F           | CTTCCAGGACAAAGGTTGCTT                         | <i>CNGC.IVA2</i> qPCR      |
| DC10 R          | GAGGTCCTTGAAAACGTAGAC                         | <i>CNGC.IVA2</i> qPCR      |
| DC11 F          | CCTTACTGGAGATCCCTTGC                          | <i>CNGC.IVA3</i> qPCR      |
| DC12 R          | TCAAAGCCCTTGAGGTATTAG                         | <i>CNGC.IVA3</i> qPCR      |
| DC13 F          | GACAAGGGTTGCTCAGCAGT                          | <i>CNGC.IVA4</i> qPCR      |
| DC14 R          | AACACGAGGACTGTGCAAGAA                         | <i>CNGC.IVA4</i> qPCR      |
| DC15 F          | GCTTTAAGGTATGAATCGCCTTAT                      | <i>CNGC.IVA5</i> qPCR      |
| DC16 R          | CCTCAATGTTTAGTTGTTACTGAG                      | <i>CNGC.IVA5</i> qPCR      |
| KH172 F         | CACCATGCCTCAATTCGACAAAG                       | <i>BRUSH gCDS</i> pENTR    |
| KH169 R         | CGACTTCGGTGTGTTGATCTG                         | <i>BRUSH gCDS</i> pENTR    |
| KH182 F         | CACCGTCGACTCGTGTGTCCTCAATTCA                  | <i>BRUSH PRO</i> pK7RWG2   |
| KH183 R         | ACTGTCGACGTTTCCTTGACGTTTCTGTAGT               | <i>BRUSH PRO</i> pK7RWG2   |
| DC17 1F         | ATGGTCTCACACCATGCCTCAATTCGACAAAGA             | <i>BRUSH CDS</i> pENTR-Bsa |
| DC18 1R         | TAGGTCTCTGTCTTCTGGCAAGCGAC                    | <i>BRUSH CDS</i> pENTR-Bsa |
| DC19 2F         | TAGGTCTCTGGACTCAGAAGGAAAGTACGTCA              | <i>BRUSH CDS</i> pENTR-Bsa |
| DC20 2R         | ATGGTCTCACCTTCGACTTCGGTGTGTTGATCTG            | <i>BRUSH CDS</i> pENTR-Bsa |
| DC77 1F         | TTGAAGACATTACGGGTCTCACACCATGCCTCAATTCGACAAAGA | <i>BRUSH CDS</i> LI GG     |
| DC58 R1         | TAGGTCTCTTTTCTGTTAAGTCTCTCACGAAT              | <i>BRUSH CDS</i> LI GG     |
| DC59 2F         | TAGGTCTCTAAACATACATCAAAGGAAGTAGAA             | <i>BRUSH CDS</i> LI GG     |

|           |                                                         |                                |
|-----------|---------------------------------------------------------|--------------------------------|
| DC78 1R   | ATGAAGACTTCAGAGGTCTCACCTTCGACTTCGGTGTTTGATCTG           | <i>BRUSH</i> CDS LI GG         |
| DC824 R   | ATGAAGACTTCAGAGGTCTCTCTTTTGTGTACAACTTAGCGTGAGG          | <i>BRUSH</i> NT pENTR-Bsa      |
| DC370     | ATGGTCTCACACCATGCATCAGGCTCACACTTCAT                     | <i>BRUSH</i> 5'RNAi LI GG      |
| DC371     | TAGGTCTCTCCTTGTCGAATTGAGGCATGTTTCCTT                    | <i>BRUSH</i> 5'RNAi LI GG      |
| DC372     | ATGGTCTCACACCGGTCGTGCTCGTGCTAATATCT                     | <i>BRUSH</i> 3'RNAi LI GG      |
| DC373     | TAGGTCTCTCCTTGGCAGAAAATAAGTTGTTTTATGATAATG              | <i>BRUSH</i> 3'RNAi LI GG      |
| DC673 F1  | ATGGTCTCACACCATGGCTCAATTGATAAAGATGAGG                   | <i>CNGC.IVA3</i> CDS pENTR-Bsa |
| DC674 R1  | TAGGTCTCTGAGCCATAGGAATAGACATTGATG                       | <i>CNGC.IVA3</i> CDS pENTR-Bsa |
| DC675 F2  | ATGGTCTCAGCTCCATGGAACCATATGATAC                         | <i>CNGC.IVA3</i> CDS pENTR-Bsa |
| DC676 R2  | TAGGTCTCTCCTTAAGCCCTTGAGAGGTATTAGCAC                    | <i>CNGC.IVA3</i> CDS pENTR-Bsa |
| DC1028 R  | ATGAAGACTTCAGAGGTCTCTCCTTATGTTGTACAACTTAGCGTGCGG        | <i>CNGC.IVA3</i> NT pENTR-Bsa  |
| DC677 F   | ATGGTCTCACACCCACCATGGCCAGTTCTGAAAACAATGAG               | <i>CNGC.IVA4</i> CDS pENTR-Bsa |
| DC678 R   | TAGGTCTCTCCTTACCTGATAATGACGAATGAGCGC                    | <i>CNGC.IVA4</i> CDS pENTR-Bsa |
| DC1029 R  | ATGAAGACTTCAGAGGTCTCTCCTTTTGTGTATGAACCTAGTGTGAGG        | <i>CNGC.IVA4</i> NT pENTR-Bsa  |
| DC679 F   | ATGGTCTCACACCCACCATGGCTAATTTTAAAAATGATGAGGTGC           | <i>CNGC.IVA4</i> CDS pENTR-Bsa |
| DC680 R   | TAGGTCTCTCCTTATGTTTAGTTGTTACTGAGGAATTAACA               | <i>CNGC.IVA5</i> CDS pENTR-Bsa |
| DC1030 R  | ATGAAGACTTCAGAGGTCTCTCCTTTTGTGAATGACTTAGTGTGAGG         | <i>CNGC.IVA5</i> NT pENTR-Bsa  |
| DC60 1F   | TTGAAGACATTCAGGGTCTCAGCGGTCGTGTTGTCACTCCATTCAAAAA       | <i>BRUSH</i> Pro LI GG         |
| DC61 1R   | TAGAAGACTGCTCTCTTAAAAGTATATCTACCTG                      | <i>BRUSH</i> Pro LI GG         |
| DC62 2F   | TAGAAGACTGAGCATAACCACTAAAACCATAGCTC                     | <i>BRUSH</i> Pro LI GG         |
| DC63 2R   | TAGAAGACTCACAAAGTTTAAATGGAAGAGTTAACAA                   | <i>BRUSH</i> Pro LI GG         |
| DC64 3F   | ATGAAGACATGTGACCTTTGATAGTATTTAAATTACAC                  | <i>BRUSH</i> Pro LI GG         |
| DC65 3R   | TTGAAGACATCAGAGGTCTCACAGAGTTTCCTTGACGTTTCTGTAGTTTT      | <i>BRUSH</i> Pro LI GG         |
| DC646 F   | ATGAAGACTTTACGGGTCTCAgcggTAATACGACTCACTATAGGGCG         | T7 $\beta$ -Globin A-B         |
| DC647 R   | ATGAAGACTTCAGAGGTCTCTcagaGGCCAAAGTTGAGCGTTTATTC         | T7 $\beta$ -Globin A-B         |
| DC648 F   | ATGAAGACTTTACGGGTCTCAaatcACCAGCCTCAAGAACCCC             | 3'UTR $\beta$ -Globin E-F      |
| DC649 R   | ATGAAGACTTCAGAGGTCTCTtcaTGTGAAGAACTTTCTTTTATTAGGA       | 3'UTR $\beta$ -Globin E-F      |
| DC916 F   | ATGAAGACTTTACGGGTCTCATCTGaacaATGGTGAGCAAGGGCGAGGA       | VYNE(R) B-C BiFC               |
| DC917 R   | ATGAAGACTTCAGAGGTCTCAGGTGccAAGATCCTCCTCAGAAATCAACTT     | VYNE(R) B-C BiFC               |
| DC918 F   | ATGAAGACTTTACGGGTCTCATCTGaacaATGGACAAGCAGAAGAACGGC      | mVYCE(R) B-C BiFC              |
| DC919 R   | ATGAAGACTTCAGAGGTCTCAGGTGccAGCGTAATCTGGAACATCGTATG      | mVYCE(R) B-C BiFC              |
| DC920 F   | ATGAAGACTTTACGGGTCTCAAAGGgaATGGAGCAAAAGTTGATTCTGAG      | VYNE D-E BiFC                  |
| DC921 R   | ATGAAGACTTCAGAGGTCTCAGATTCTACTCGATGTTGTGGCGGAT          | VYNE D-E BiFC                  |
| DC922 F   | ATGAAGACTTTACGGGTCTCAAAGGgaATGTACCCATACGATGTTCCAG       | mVYCE D-E BiFC                 |
| DC923 R   | ATGAAGACTTCAGAGGTCTCAGATTTTACTTGACAGCTCGTCCATG          | mVYCE D-E BiFC                 |
| DC984 F1  | ATGAAGACTTTACGGGTCTCAGCGGATCACATCAGCCTCCCTATCC          | <i>CNGC.IVA3</i> Pro LI GG     |
| DC985 R1  | TAGAAGACAAGTCACTCTTGTATTGAACCGCAAG                      | <i>CNGC.IVA3</i> Pro LI GG     |
| DC986 F2  | TAGAAGACAATGACCCTCATGGCTTCACGCAA                        | <i>CNGC.IVA3</i> Pro LI GG     |
| DC987 R2  | TAGAAGACAAAAGTCTTTGACAAAGTCATTTGTTGAG                   | <i>CNGC.IVA3</i> Pro LI GG     |
| DC988 F3  | TAGAAGACAACTTCCTTCATCTTCACAAGTAC                        | <i>CNGC.IVA3</i> Pro LI GG     |
| DC989 R3  | ATGAAGACTTCAGAGGTCTCACAGAGTTTCCTTCACGATTCTGCAGT         | <i>CNGC.IVA3</i> Pro LI GG     |
| DC1031 F1 | ATGAAGACTTTACGGGTCTCAGCGG CGC CTT GTC CAT CAA CTC TCT T | <i>CNGC.IVA4</i> Pro LI GG     |
| DC979 R2  | TAGAAGACAAATGTAGACCTCAACTTTTCAGGACT                     | <i>CNGC.IVA4</i> Pro LI GG     |
| DC980 F3  | TAGAAGACAAACATCTGGAACAAATCTAAATTGCA                     | <i>CNGC.IVA4</i> Pro LI GG     |
| DC981 R3  | ATGAAGACTTCAGAGGTCTCACAGAGCTTCCTTGACAATTCTATAATTTT      | <i>CNGC.IVA4</i> Pro LI GG     |

|           |                                                   |                            |
|-----------|---------------------------------------------------|----------------------------|
| DC970 F1  | ATGAAGACTTTACGGGTCTCAGCGGCTCTCTCTCGAACTCTTTCGTC   | <i>CNGC.IVA5</i> Pro LI GG |
| DC971 R1  | TAGAAGACAAGAGTCCTGTTAAGAAGTGGAGTTCG               | <i>CNGC.IVA5</i> Pro LI GG |
| DC972 F2  | TAGAAGACAAACTCAGTCACCTACTCTTCTGT                  | <i>CNGC.IVA5</i> Pro LI GG |
| DC973 R2  | ATGAAGACTTCAGAGGTCTCACAGAGCTTCTCAATAATTCTGTAATTTT | <i>CNGC.IVA5</i> Pro LI GG |
| DC1034 F1 | ATGAAGACTTTACGGGTCTCACACCATGGCTCACACTAGGACTTTCAC  | <i>AtCNGC19</i> NT LI GG   |
| DC1035 R1 | TAGAAGACAAGAACACGAAATCATCTTCAGGTGG                | <i>AtCNGC19</i> NT LI GG   |
| DC1036 F2 | TAGAAGACAAGTTCAAAAACGCAAATCTCTTGAG                | <i>AtCNGC19</i> NT LI GG   |
| DC1037 R  | ATGAAGACTTCAGAGGTCTCACCTTGACTTGAACAAATTTGGAATGAGG | <i>AtCNGC19</i> NT LI GG   |
| DC1038 F  | ATGAAGACTTTACGGGTCTCACACCATGGCTCCACAACGAAAACG     | <i>AtCNGC20</i> NT LI GG   |
| DC1039 R  | ATGAAGACTTCAGAGGTCTCACCTTGGTTTGAACCTCTTTGGCATGA   | <i>AtCNGC20</i> NT LI GG   |
