# Supplementary material for: A quantitative hypermorphic CNGC allele confers ectopic calcium flux and impairs cellular development
Source: eLife journal article supplement (doi:10.7554/elife.25012), 2017-09-21
Supplement: supp [file elife-25012-supp-v1.zip › elife_poa_e25012_Supplementary_File_2.pdf]

**Supplementary File 2. DNA plasmids used in this study.**

| <b>ID</b> | <b>Complementation</b>                             | <b>Backbone</b> | <b>Selection Marker</b> | <b>Cloning Method</b> |
|-----------|----------------------------------------------------|-----------------|-------------------------|-----------------------|
| DC001     | <i>BRUSH<sub>pro</sub>:BRUSH<sub>genomic</sub></i> | pK7RWG2 (-35S)  | <i>Kanamycin</i>        | Gateway + Digest      |
| DC002     | <i>UBQ<sub>pro</sub>:BRUSH<sub>genomic</sub></i>   | pUB-GW-GFP      | <i>35S:GFP</i>          | Gateway               |
| DC003     | <i>UBQ<sub>pro</sub>:brush<sub>genomic</sub></i>   | pUB-GW-GFP      | <i>35S:GFP</i>          | Gateway               |
| DC004     | <i>UBQ<sub>pro</sub>:CNGC.IVA3<sub>CDS</sub></i>   | pUB-GW-GFP      | <i>35S:GFP</i>          | Gateway               |
| DC005     | <i>UBQ<sub>pro</sub>:CNGC.IVA4<sub>CDS</sub></i>   | pUB-GW-GFP      | <i>35S:GFP</i>          | Gateway               |
| DC006     | <i>UBQ<sub>pro</sub>:CNGC.IVA5<sub>CDS</sub></i>   | pUB-GW-GFP      | <i>35S:GFP</i>          | Gateway               |
| DC007     | <i>UBQ<sub>pro</sub>:AtCNGC19<sub>CDS</sub></i>    | pUB-GW-GFP      | <i>35S:GFP</i>          | Gateway               |
| DC008     | <i>UBQ<sub>pro</sub>:AtCNGC20<sub>CDS</sub></i>    | pUB-GW-GFP      | <i>35S:GFP</i>          | Gateway               |
|           | <b>RNAi</b>                                        | <b>Backbone</b> | <b>Selection Marker</b> | <b>Cloning</b>        |
| GC287     | <i>UBQ<sub>pro</sub>:BRUSH 5'RNAi</i>              | BB53 LIIIβ A-B  | <i>UBQ10:NLS-2xYFP</i>  | Golden Gate           |
| GC288     | <i>UBQ<sub>pro</sub>:BRUSH 3'RNAi</i>              | BB53 LIIIβ A-B  | <i>UBQ10:NLS-2xYFP</i>  | Golden Gate           |
|           | <b>Promoter:GUS</b>                                | <b>Backbone</b> | <b>Selection Marker</b> | <b>Cloning</b>        |
| GC219     | <i>BRUSH<sub>pro</sub>:GUS</i>                     | BB53 LIIIβ A-B  | <i>UBQ10:GFP</i>        | Golden Gate           |
| GC320     | <i>CNGC.IVA3<sub>pro</sub>:GUS</i>                 | BB53 LIIIβ A-B  | <i>UBQ10:NLS-2xYFP</i>  | Golden Gate           |
| GC321     | <i>CNGC.IVA4<sub>pro</sub>:GUS</i>                 | BB53 LIIIβ A-B  | <i>UBQ10:NLS-2xYFP</i>  | Golden Gate           |
| GC322     | <i>CNGC.IVA5<sub>pro</sub>:GUS</i>                 | BB53 LIIIβ A-B  | <i>UBQ10:NLS-2xYFP</i>  | Golden Gate           |
|           | <b><i>Xenopus laevis</i></b>                       | <b>Backbone</b> | <b>Selection Marker</b> | <b>Cloning</b>        |
| GC188     | <i>T7<sub>pro</sub>: brush</i>                     | pSEVA191 1-2    | Carbenicillin           | Golden Gate           |
| GC189     | <i>T7<sub>pro</sub>: BRUSH</i>                     | pSEVA191 1-2    | Carbenicillin           | Golden Gate           |
| GC190     | <i>T7<sub>pro</sub>: brush -YFP</i>                | pSEVA191 1-2    | Carbenicillin           | Golden Gate           |
| GC191     | <i>T7<sub>pro</sub>: BRUSH -YFP</i>                | pSEVA191 1-2    | Carbenicillin           | Golden Gate           |
| GS40      | <i>T7<sub>pro</sub>: VN-BRUSH</i>                  | pSEVA191 1-2    | Carbenicillin           | Golden Gate           |
| GC313     | <i>T7<sub>pro</sub>: VC-BRUSH</i>                  | pSEVA191 1-2    | Carbenicillin           | Golden Gate           |
| GC262     | <i>T7<sub>pro</sub>: BRUSH –VC</i>                 | pSEVA191 1-2    | Carbenicillin           | Golden Gate           |
| GS39      | <i>T7<sub>pro</sub>: VN-brush</i>                  | pSEVA191 1-2    | Carbenicillin           | Golden Gate           |
| GS41      | <i>T7<sub>pro</sub>: VC- brush</i>                 | pSEVA191 1-2    | Carbenicillin           | Golden Gate           |
| GC261     | <i>T7<sub>pro</sub>: brush –VC</i>                 | pSEVA191 1-2    | Carbenicillin           | Golden Gate           |
| GC609     | <i>T7<sub>pro</sub>: KAT1 –VC</i>                  | pSEVA191 1-2    | Carbenicillin           | Golden Gate           |
| GC610     | <i>T7<sub>pro</sub>: KAT1 –VN</i>                  | pSEVA191 1-2    | Carbenicillin           | Golden Gate           |
|           | <b>Yeast Two-Hybrid</b>                            | <b>Backbone</b> | <b>Selection Marker</b> | <b>Cloning</b>        |
| DC009     | BD-BRUSH NT                                        | pGBKT7-GW       | Tryptophan              | Gateway               |
| DC010     | AD-BRUSH NT                                        | pGADT7-GW       | Leucine                 | Gateway               |
| DC011     | AD-brush NT                                        | pGADT7-GW       | Leucine                 | Gateway               |
| DC012     | AD-CNGC.IVA3 NT                                    | pGADT7-GW       | Leucine                 | Gateway               |
| DC013     | AD-CNGC.IVA4 NT                                    | pGADT7-GW       | Leucine                 | Gateway               |
| DC014     | AD-CNGC.IVA5 NT                                    | pGADT7-GW       | Leucine                 | Gateway               |
|           | <b>Split Ubiquitin</b>                             | <b>Backbone</b> | <b>Selection Marker</b> | <b>Cloning</b>        |
| DC015     | BRUSH-Cub                                          | pMetYC_GW       | Leucine                 | Gateway               |
| DC016     | NubWT-BRUSH                                        | pNWTX_GW        | Tryptophan              | Gateway               |
| DC017     | BRUSH-NubWT                                        | pXNWT_GW        | Tryptophan              | Gateway               |

|       |                  |                |            |         |
|-------|------------------|----------------|------------|---------|
| DC018 | Positive Control | pNubWT-X_Gate  | Tryptophan | Gateway |
| DC019 | Negative Control | pNX_Gate32-3HA | Tryptophan | Gateway |
