# Supplementary material for: A quantitative hypermorphic CNGC allele confers ectopic calcium flux and impairs cellular development
Source: eLife journal article supplement (doi:10.7554/elife.25012), 2017-09-21
Supplement: supp [file elife-25012-supp-v1.zip › elife_poa_e25012_Supplementary_File_3.pdf]

**Supplementary File 3. List of key plant material used in this study (internal Zopra database IDs)**

| Seed ID | Plant No. | Description      | Generation | Comment            |
|---------|-----------|------------------|------------|--------------------|
| 2601    | SL0979    | Mutant Seed      | M1         |                    |
| 10978   | SL0979-2  | Mutant Seed      | M2         |                    |
| 6125    | H474      | Mutant Seed      | M3         |                    |
| 8656    | J6899     | Mutant Seed      | M4         |                    |
| 8656    | J6900     | Mutant Seed      | M4         |                    |
| 8656    | J6901     | Mutant Seed      | M4         |                    |
| 8656    | J6902     | Mutant Seed      | M4         |                    |
| 55896   |           | J6900 M4 x MG-20 | F1         |                    |
| 55897   |           | J6900 M4 x MG-20 | F1         |                    |
| 55898   |           | J6900 M4 x MG-20 | F1         |                    |
| 55899   |           | J6900 M4 x MG-20 | F1         |                    |
| 55900   |           | J6900 M4 x MG-20 | F1         |                    |
| 55901   |           | J6902 M4 x MG-20 | F1         |                    |
| 59952   |           | Mutant Seed      | M5         |                    |
| 59953   |           | Mutant Seed      | M5         |                    |
| 59954   |           | Mutant Seed      | M5         |                    |
|         | L8257     | Mutant           | M5         | Next-Gen Sequenced |
|         | L2704     | Recombinant      | F2         | F3 Mutant          |
|         | L2717     | Recombinant      | F2         | F3 Segregating     |
|         | L5936     | Recombinant      | F2         | F3 Segregating     |
|         | L6492     | Recombinant      | F2         | F3 Segregating     |
|         | L6499     | Recombinant      | F2         | F3 Segregating     |
|         | L6500     | Recombinant      | F2         | F3 Segregating     |
|         | L6920     | Recombinant      | F2         | F3 Segregating     |
| 11483   | SL1484    | Mutant Seed      | M2         |                    |
| 31484   | SL1484-1  | Mutant Seed      | M3         |                    |
| 87136   | SL1484-1  | Mutant Seed      | M4         |                    |
